# Supplementary material
Source: PubMed Central journal article supplement (PMC3648135)
Supplement: JVI.00840-12_zjv999097618so1.pdf [file JVI.00840-12_zjv999097618so1.pdf]

**Text S1. Nucleotide sequences of mutant HCV segments.** In the following section, the substituted nucleotides are shown in Red (non-conserved change) and Green (conserved change). The nucleotides in the wobble positions of codons were substituted. Hepatitis C viruses containing each mutant segment were tested for replication kinetics in cell culture condition. nt: nucleotide

1) Segment 1 (nt 3872-4156) (285 bp, Black:170, Green:85, Red:30)

GGGCAUGUGGUGGGCUUGUUUAGGGCCGCCGUCUGUAGCAGGGGGGUCGCUAAGAGCAUUGACUUUAUAC  
CAGUGGAAACCUUGGAUGUGGUGACCCGGAGCCCAACUUUCCGAUAAUUCACCCCCCGCCGUC  
ACAACGUACCAAGUGGGCUAUCUCCACGCCCCACCGGUCGGCAAUCCACGAAAGUGCCCGUGGCC  
UACGCGGCUCAAGGCUAUAAGGUGUUGUCUUGAAUCCAAGCGUGGCCGCUACGUUGGGCUUCGGCGCCU  
AUUUG

2) Segment 2 (nt 4157-4441) (285 bp, Black:178, Green:88, Red:19)

AGCAAAGCCACGGGAUUAACCCAAAUAUCCGCACCGCGUGCGGACGGUCAUGACGGGCGAAGCGAUUA  
CCUAUAGCACCUACGGGAAGUUUUGGUGACGGCGGGUGGCCUCGGGGCUUACGAUUAUUAUUAUCUG  
UGACGAGUGUCAUGCCGUCGACGCCACGAGCAUCUUGGGGAUAGGCACCGUGUUGGACCAGGCCGAAACC  
GCGGGCGUGCGGUUGACCGUCUUGGCCACCGCGACCCACCAGGCAGCGUCACCACGCCACACCAGACA  
UCGAG

3) Segment 3 (nt 4442-4726) (305 bp, Black:200, Green:85, Red:20)

GAAGUGGGGUUGGGCAGGGAAGGCGAUAUACCAUUUACGGCCGGGCCAUCCC AUUGAGCUGUAUAAAAG  
GCGGCCCGGAUUUGAUUUUGUCAUAGCAA AAGAAUGCGAUGAAUUGGCCGCCGCGUUGAGGGGGAU  
GGGGCUGAAUGCCGUAGCCUACUACUCAACGCGUGUCGCCUAUUAACGGGGCCUCGAUGUGAGCAUCAUC  
CCGCCCAAGGCGACGUCGUGCGUGGCUACGGAU GCGUUGAUGACCGGCUAUACCGGCGAUUUCGAUAG  
CGUCAUUGAUUGUAACGUGGCCGUG

4) Segment 4 (nt 4727-5011) (285 bp, Black:171, Green:86, Red:28)

ACGCAGGCCGUGGAUUUUCUCCUCGAUCCAACGUUJACCAUCACGACCCAAACCGUGCCCCAGGAUGCCG  
UGAGCAGGUCCAAAGGAGGGGCAGGACCGGCCGGGGCCGGCAAGGGACCUACCGGUACGUGAGCACC GG  
CGAGAGGGCUAGCGGCAUGUUCGAUUCGUGGUCUUGUGCGAAUGUUAUGAUGCCGGCGCCGCCUGGUAU  
GACUUGACCCCGCCGAACGACGUGCGGUUGCGGGCCUACUUUAUACCCAGGGUUGCCAGUCUGCC  
AGGAU

5) Segment 5 (nt 5012-5299) (288 bp, Black:186, Green:87, Red:15)

CACUUGGAGUUCUGGGAAGCCGUGUUUACGGGGUUGACCCAUAUCGAUGC CAUUUUUUGAGCCAGACCA  
AACAGGCCCGCGAAAAUUUUGCCUAUJUGGUGGCGUAUCAGGCCACCGUCUGUGCGCGGGCGAAAGGCC  
CCCACCAGCUGGGAUGCGAUGUGGAAUGUUUGGCUAGGUUGAAACCCACCUUGGCCGGGCCAACCC  
UUUGUUGUAUAGGUCUGGGCCCAUCACGAACGAAGUGACGUUGACCCAUCCGGCACCAAUAUUAUGCUA  
CAUGCAUG

6) Segment 6 (nt 5300-5650) (351 bp, Black:225, Green:97, Red:29)

CAGGCCGAUUUGGAAAGUGAUGACGUCACCUGGGUGUUGGCCGGCGGCGUGUUGGCCGCGGGUGGCGGCCU  
ACUGUUUGGCCACCGGCUGUGUGAGCAUUAUAGGGAGGCUCCAUGUGAAUCAAGGGUGGUGGGUGGCCCC  
CGACAAAGAAGUGUUGUACGAAGCCUUCGACGAAUUGGAAGAGUGUGCGAGCCGGCCGCCUUGAUAGAG  
GAAGGCCAAAGGAUCGUGAAAUGCUCAAAGCAAUAACAGGGGCUUUGCAACAAGCGAGCAAACAAG  
CUCAAGAUAUCCAGCCAGCAUGCAAGCCAGCUGGCCAAAGGUCGAGCAGUUCUGGGCGCGGCAUAUGUG  
G

7) Segment 7 (nt 5651-6010) (360 bp, Black:218, Green:108, Red:34)

AAUUUUAUCUCGGGAUUCAGUAUUUGGCCGGCCUCAGCACCUUGCCCGGCAAUCCAGCCGUCGCCAGCA  
UGAUGGCCUUUUCCGCUGCGUUGACGUCCCCCUCAGCACGUCCACGACGAUUUUGUUGAAUAUUAUGGG  
CGGGUGGCUCGCGCAGCCAAUAGCCCCCAGCCGGCGCGACGGGUUCGUGGGUUCGGGUUGGUCCGC  
GCCGCUUGUCGGGUCCAUCGGGUUGGGCAAAGUCUUGGUCGAUUUUUGGCCGGCUACGGCGCCGGGAUCA  
GCGGCGCGUUGGUGGCCUUUAAAUUAUGAGCGGGGAAAACCAAGCAUGGAGGACGUGAUAAACUUGUU  
GCCCGGAUC

8) Segment 8 (nt 6011-6301) (291 bp, Black:173, Green:92, Red:26)

CUCAGCCCCGGCGCGUUGGUUGUCGGCGUGAUUUGCGCGUAUCUUGAGGAGGCAUGUCGGCCCCGGCG  
AAGGGCCGUGCAGUGGAUGAAUCGGUUGAUCGCUUUCGCGAGCCGGGCAAUCAUGUGGCGCCACCCA  
UUAUGUCACCGAAAGCGACGCGCAGCCAAAGGGUCACGCAGUUGUUGGGGAGCUUGACCAUCACGUCCUUG  
UUGCGGCGGUUGCAUAAACUGGAUCACCGAAGAUUGUCCAAUUCUUGUAGCGGCAGCUGGUUGAGGGAUG  
UCUGGGAUUGG

9) Segment 9 (nt 6302-6592) (291 bp, Black:187, Green:83, Red: 21)

GUGUGUACGAUACUCACCGAUUUUAAGAACUGGUUGACGAGCAAGCUCUUUCCAAAUAUGCCAGGGUUGC  
CAUUUAUAAGCUGCCAGAAAGGCUAUAAAGGCGUCUGGGCUGGGACCGGGAUUAUGACGACCAGGUGJCC  
CUGUGGGGCUAAUAUJAGCGGGAACGUGAGGUUGGGGAGCAUGCGGAUAACCGGCCCAAGACGUGUAUG  
AAUACGUGGCAAGGCACGUUCCCCAUUAAACUGUUAUACCGAAGGGCAUUGUCGCCCAAGCCACCAACCA  
AUUAUAAAACG

10) Segment 10 (nt 6593-6880) ( 288 bp, Black:178, Green:78, Red:32)

GCGAUUUGGCCGGGUCGCCGCGAGCGAAUAUGCCGAAGUCACCCAACACGGCAGCUAUAGCUACGUGACCG  
GCUUGACGACCAGUAACUUGAAGAUCCCCUGUCAGUUGCCAGCCCCGAGUUCUUUAGCUGGGUCGAUJGG  
CGUCCAAUAACACCGGUUCGCCCAACCCCAAACCCUUCUUUAGGGACGAAGUGAGCUUUUGUGUGGGC  
UUGAAAGCUACGCGCGUGGGCAGCCAUUGCCAUJCGAGCCCGAAACAGAUJCCGAUJUGUCUCGGAGCA  
UGUUGACC

11) Segment 11 (nt 6881-7168) ( 288 bp, Black:168, Green:73, Red:47)

GACCCCCACAUAUAACCGCCGAAACCGCCGCAGGAGGCUCGCAGGGGCAGCCCCCAGCGAAGCCU  
CCAGCAGCGUCUCCAAUUGAGCGCCCCAGCUUGAGGGCGACGUGUACGACGCAUCCAAUACAUCGA  
UGUCGAUAUGGUGGACGCGAAUUUGUUGAUGGAAGGGGGCGUCGCCAAACCGAACCCGAAAGCCGGGUC  
CCAGUGUUGGAUUUCUUGGAACCCAUGGCUGAAGAGGAAUCCGAUUUGGAACCAAGCAUCCCCAGCGAAU  
GUAUGUUG

12) Segment 12 (7169-7456) (288 bp, Black:174, Green:93, Red:21)

CCACGCUCCGGCUUCCCCAGGGCUCUCCCCGCCUGGGCCAGGCCCGAUUAUAAUCCCCCUUGGUCGAGA  
GCUGGCGGCGGCCGACUAUCAGCCCCAACGGUGGCCGGCUGCGCUUGCCACCACCAAAAAAGCUCC  
CACCCCCCACC CGCGGAGGAGACCGUCGGCUUGUCCGAUCCACGAUCAGCGAGGCUUUGCAACAG  
UUGGCGAUUAAAACGUUCGGCAACCAACAGCUCCGGCGACGCCGGGAGCAGCACCGGC GC CGGGCUG  
CGGAGAGC

13) Segment 13 (nt 7457-7786) (330 bp, Black:199, Green:73, Red:58)

GGCGGACCGAC CAGCCCCGGCGAACCCGCUCCAAGCGAAACCGGCAGCGCGAGCAGCAUGCCACCAUUGG  
AAGGCGAACCCGGCGACCCCGAUUUGGAAAGCGACCAAGUGGAAUUGCAGCCCCACCAACAAGGCGGCGG  
CGUGGCCCCAGGCAGCGGGAGCGGCAGCUGGAGCACCUGUAGCGAAGAAGAUACACGACGGUCUGUUGU  
AGCAUGAGCUAUAGCUGGACGGGCGCCUUGAUCACCCAUGCUCCCCAGAGGAAGAGAAACUCCCCAUAA  
AUCCCCUCUCAAUAGCUUGCUCAGGUAUCACAAUAAAGUCUAUUGUACA

14) Segment 14 (nt 7787-8113) ( 327 bp, Black:193, Green:94, Red: 40)

ACCAGCAAUCCGCUAGCCAACGGGCCAAGAAAGUGACCUUCGAUCGGACCAGGUCUUGGAUUGCACUC  
ACGAUAGCGUGCUCAAAGAUAUAAAUUGGCCGCCAGCAAAGUUCGCCCGGUUGUUGACGCUCGAAGA  
AGCCUGUCAACUCACCCCCCACAGCGCCGGAGCAAUAACGGCUUUGGCGGAAAGAAUGAGGUCC  
CUCAGCGGCCGGGCGGUGAAUCAUAUAAAAGCGUCUGGAAAGAUUUGUUGGAAGA UCCCAGACCCCA  
UCCCAACCACGAUUAUGGCGAAGAACGAAGUCUUUUGUGUCGAUCCA

15) Segment 15 (nt 8114-8440) (327 bp, black:202, green:91, red:34)

GCUAAAGGCGGCAA AAAGCCCGCCAGGUUGAUUGUGUAUCCCGAUUUGGGGGUGAGGGUGUGUGAAAGA  
UGGCGUUGUACGAUAUCACCCAGAAAUUGCCCCAAGCCGUGAUGGGCGCCAGCUACGGUUUCAUAUAG  
CCCCGCU CAGAGGGUCGAUAUCUUGCUC AAGGCCUGGGCCGAGAAAAGAUCCA AUGGGCUUCAGCUAC  
GACACGAGGUGUUUGAUAGCACGGUGACCGAACGGGAUAUUCGGACGGAAGAAAGCAUCUAUCAAGCGU  
GUAGCUUGCCAGAAAGAAGCGAGGACCGCUAUCCAUAGCUUGACCGAA

16) Segment 16 (nt 8441-8767)(327 bp, black:200, green:91, red:36)

CGGUUGUAUGUGGGCGGCCCAAUGUUUAAUUCCAAAGGCCAGACGUGUGGCUAUCGGAGGUGUAGGGCUU  
CCGGCGUCUUGACGACCUCCAUGGGCAAUACGAUAACCUUUACGUCAAGGCGUUGGCCGCUUGUAAAGC  
CGCCGGCAUCGUGGCCCCAACCAUGUUGGUGUGUGGGGACGAUUUGGUGGUAUAGCGAGUCCCAAGGC  
ACCGAAGAAGAUGAAAGGAAUUUGCGGGCUUUUACCGAAGCGAUGACCGGUUAUAGCGCGCCCCCGGCG  
ACCCACCACGGCCCGAGUACGAUUUGGAAUUGAUCACCAGCUGCAGC

17) Segment 17 (nt 8768-9097) (330 bp, black:201, green:91, red:38)

AGCAACGUCAGCGUCGCCUCGGGCCAGGGGGAGGAGCGGUUAUUAUUUGACCGCGGAUCCACGACCC  
CCUUGGCUAGGGCCGCGUGGGAGACCGUGCGGCAUAGCCCCAUAAACAGCUGGUUGGGCAAUAUAAUACA  
AUACGCCCCACGAUCUGGGUGAGGAUGGUGUUGAUGACC AUUUUUUAGCAUCUUGAUGGUGCAGGAU  
ACGUUGGAUCAAAAUUUGAAUUUCGAAUGUACGGCAGCGUGUAUAGCGUCAACCCUCGAUUUGCCCG  
CUAUCAUCGAACGGCUCCAUGGCUUGGAUGCGUUCAGCAUGCACACCUAU

**Text S2. Sequence alignment of wild-type and mutant sub-segments in the JFH-1 NS5B coding region.** Nucleotide changes introduced in the 28 sub-segments are shown below. JFH-1 genome positions and total number of silent mutations introduced in each sub-segment are given. Asterisks indicate unmodified nucleotides. CLUSTAL 2.0.12 multiple sequence alignment program was used.

1. Sub-segment 7787-7837 (total substitutions = 22)
 

|          |                                                                                                   |
|----------|---------------------------------------------------------------------------------------------------|
| wildtype | ACAUCAAGAGCGCCUCACAGAGGGCUAAAAAGGUAACUUUUGACAGGACG                                                |
| mutant   | ACCAGCAAUCCGCUAGCCAACGGGCCAAGAAAGUGACCUUCGAUCGGACC                                                |
|          | **        **        ***        **        ***** ** ** ** ** ** ** ** ** ** ** ** ** ** ** ** ** ** |
  
2. Sub-segment 7838-7888 (total substitutions = 22)
 

|          |                                                                 |
|----------|-----------------------------------------------------------------|
| wildtype | CAAGUGCUCGACGCCAUUAUGACUCAGUCUAAAAGGACAUCAAGCUAGCG              |
| mutant   | CAGGUCUUGGAUGCGCACUACGAUAGCGUGCUCAAAGAUUAAAAUUGGCC              |
|          | ** ** * ** ** ** ** ** ** **        ** * ** ** ** ** ** ** * ** |
  
3. Sub-segment 7889-7939 (total substitutions = 23)
 

|          |                                                                                           |
|----------|-------------------------------------------------------------------------------------------|
| wildtype | GCUUCCAAGGUCAGCGCAAGGCUCACCUUGGAGGAGGCGUGCCAGUUG                                          |
| mutant   | GCCAGCAAAGUGUCCGCCCGGUUGUUGACGCUCGAAGAAGCCUGUCAACUC                                       |
|          | **        *** **        ***        ** *        * **        * ** ** ** ** ** ** ** ** ** * |
  
4. Sub-segment 7940-7990 (total substitutions = 21)
 

|          |                                                                                          |
|----------|------------------------------------------------------------------------------------------|
| wildtype | ACUCCACCCCAUUCUGCAAGAUCCAAGUAUGGAUUCGGGGCCAAGGAGGUC                                      |
| mutant   | ACCCCCCACACAGCGCCCGGAGCAAUACGGCUUUGGCGGAAAGAAGUC                                         |
|          | ** ** ** ** **        ** *        *** ** ** ** ** ** ** ** ** ** ** ** ** ** ** ** ** ** |
  
5. Sub-segment 7991-8041 (total substitutions = 21)
 

|          |                                                                                        |
|----------|----------------------------------------------------------------------------------------|
| wildtype | CGCAGCUUGUCCGGGAGGGCCGUUAACCACAUCAAGUCCGUGUGGAAGGAC                                    |
| mutant   | AGGUCCCUCAGCGGCCGGGCGUGAAUCAUAAAAAGCGUCUGGAAAGAU                                       |
|          | *        * *        ***        ***** ** ** ** ** ** ** ** ** ** **        *** ***** ** |
  
6. Sub-segment 8042-8092 (total substitutions = 16)
 

|          |                                                                            |
|----------|----------------------------------------------------------------------------|
| wildtype | CUCCUGGAAGACCCACAAACACCAAUCCCAACCAUCAUGGCCAAAAAU                           |
| mutant   | UUGUUGGAAGAUCCCAGACCCCAUCCCAACCACGAUUAUGGCGAAGAAC                          |
|          | *        ***** ** ** ** ** ** ** ** ** ** ** ** ** ** ** **        * ** ** |
  
7. Sub-segment 8093-8143 (total substitutions = 19)
 

|          |                                                                                                                          |
|----------|--------------------------------------------------------------------------------------------------------------------------|
| wildtype | GAGGUGUUCUGCGUGGACCCCGCCAAGGGGGGUAAGAAACCAGCUCGCCUC                                                                      |
| mutant   | GAAGUCUUUUGUGUCGAUCCAGCUAAAGGCGGCAAAAAGCCCGCCAGGUUG                                                                      |
|          | ** ** ** ** ** ** ** ** **        ** ** ** **        ** ** **        ** ** **        ** ** **        ** ** **        * * |
  
8. Sub-segment 8144-8194 (total substitutions = 18)
 

|          |                                                                       |
|----------|-----------------------------------------------------------------------|
| wildtype | AUCGUUUACCCUGACCUCGGCGUCCGGGUCUGCGAGAAAUGGCCCUUAU                     |
| mutant   | AUUGUGUAUCCCGAUUUGGGGGUGAGGGUGUGUGAAAAGAUGGCGUUGUAC                   |
|          | ** ** ** ** **        * ** **        ***** ** ** **        ***** * ** |
  
9. Sub-segment 8195-8245 (total substitutions = 18)
 

|          |                                                                             |
|----------|-----------------------------------------------------------------------------|
| wildtype | GACAUUACACAAAAGCUUCCUCAGGCGGUAUUGGGAGCUUCCUAUGGCUUC                         |
| mutant   | GAUAUCACCCAGAAUUGCCCCAAGCCGUGAUGGGCGCCAGCUACGGGUUU                          |
|          | ** ** ** **        * ** **        ** ** **        ***** **        *** ** ** |
  
10. Sub-segment 8246-8296 (total substitutions = 19)
 

|          |                                                                            |
|----------|----------------------------------------------------------------------------|
| wildtype | CAGUACUCCCCUGCCCAACGGGUGGAGUAUCUCUUGAAAGCAUGGGCGGAA                        |
| mutant   | CAAUUAGCCCCGUCAGAGGGUCGAAUACUUGCUCUAAAGCCUGGGCCGAG                         |
|          | ** **        *** ** **        ***** ** **        * * ** **        ***** ** |

11. Sub-segment 8297-8347(total substitutions = 21)  
wildtype AAGAAGGACCCCAUGGGUUUUUCGUAUGAUACCCGAUGCUUCGACUCAACC  
mutant AAAAAAGAUCCAAUGGGCUUCAGCUACGACACGAGGUGUUUUGAUAGCACG  
\*\* \*\* \* \* \* \* \* \* \* \* \* \* \* \* \* \* \* \* \* \* \* \* \* \*

12. Sub-segment 8348-8398(total substitutions = 20)  
wildtype GUCACUGAGAGAGACAUCAGGACCGAGGAGUCCAUAUACCAGGCCUGCUCC  
mutant GUGACCGAACGGGAUAUUCGGACGGAAGAAAGCAUCUAUCAAGCGUGUAGC  
\*\* \*\* \* \* \* \* \* \* \* \* \* \* \* \* \* \* \* \* \* \* \* \* \*

13. Sub-segment 8399-8449(total substitutions = 22)  
wildtype CUGCCCGAGGAGGCCCGCACUGCCAUAACACUCGCGUGACUGAGAGACUUUAC  
mutant UUGCCAGAAGAAGCGAGGACCGCUAUCCAUAAGCUUGACCGAACGGUUGUAU  
\*\*\*\* \* \* \* \* \* \* \* \* \* \* \* \* \* \* \* \* \* \* \* \*

14. Sub-segment 8450-8500(total substitutions = 19)  
wildtype GUAGGAGGGCCCAUGUUCAACAGCAAGGGUCAAAACCUGCGGUUACAGACGU  
mutant GUGGGCGGCCCAUGUUUAAUUCCAAAGGCCAGACGUGUGGCUAUCGGAGG  
\*\* \*\* \* \* \* \* \* \* \* \* \* \* \* \* \* \* \* \* \* \* \* \* \*

15. Sub-segment 8501-8551(total substitutions = 20)  
wildtype UGCCGCGCCAGCGGGGUGCUAACCACUAGCAUGGGUAAACCAUCAUAUGC  
mutant UGUAGGGCUUCCGGCGUCUUGACGACCUCCAUGGGCAAUACGAUAACCUGU  
\*\* \* \* \* \* \* \* \* \* \* \* \* \* \* \* \* \* \* \* \* \* \* \*

16. Sub-segment 8552-8602(total substitutions = 18)  
wildtype UAUGUGAAAGCCCUAGCGGCCUGCAAGGCUGCGGGGAUAGUUGCGCCACACA  
mutant UACGUCAAGGCGUUGGCCGCUUGUAAAGCCGCGGCAUCGUGGCCCAAC  
\*\* \*\* \* \* \* \* \* \* \* \* \* \* \* \* \* \* \* \* \* \* \* \* \*

17. Sub-segment 8603-8653(total substitutions = 20)  
wildtype AUGCUGGUAUGCGGCGAUGACCUAGUAGUCAUCUCAGAAAGCCAGGGGACU  
mutant AUGUUGGUGUGUGGGGACGAUUUGGUGGUGAUUAGCGAGUCCCAAGGCACC  
\*\*\* \*\* \* \* \* \* \* \* \* \* \* \* \* \* \* \* \* \* \* \* \* \* \*

18. Sub-segment 8654-8704(total substitutions = 17)  
wildtype GAGGAGGACGAGCGGAACCUGAGAGCCUUCACGGAGGCCAUGACCAGGUAC  
mutant GAAGAAGAUGAAAGGAAUUUGCGGGCUUUUACCGAAGCGAUGACGCGGUAU  
\*\* \*\* \* \* \* \* \* \* \* \* \* \* \* \* \* \* \* \* \* \* \* \* \*

19. Sub-segment 8705-8755(total substitutions = 21)  
wildtype UCUGCCCCUCCUGGUGAUCCCCCAGACCGGAAUAUGACCUGGAGCUAAUA  
mutant AGCGCGCCCCCGGCGACCCACCACGGCCCCGAGUACGAUUUGGAAUUGAUC  
\*\* \*\* \* \* \* \* \* \* \* \* \* \* \* \* \* \* \* \* \* \* \* \* \*

20. Sub-segment 8756-8806(total substitutions = 26)  
wildtype ACAUCCUGUUCCUCAAAUGUGUCUGUGGCGUUGGGCCCGGGGCCCGCCGC  
mutant ACCAGCUGCAGCAGCAACGUCAGCGUCGCCUCGGGCCAGGGGGAGGAGG  
\*\* \*\* \* \* \* \* \* \* \* \* \* \* \* \* \* \* \* \* \* \* \* \* \*

21. Sub-segment 8807-8857(total substitutions = 19)  
wildtype AGAUACUACCUGACCAGAGACCCAACCACUCCACUCGCCCGGGCUGCCUGG  
mutant CGGUUUUUUUGACGCGGAUCCACGACCCCUUGGCUAGGGCCGCGUGG  
\* \* \* \* \* \* \* \* \* \* \* \* \* \* \* \* \* \* \* \* \* \*

22. Sub-segment 8858-8908(total substitutions = 20)

|          |                                                       |
|----------|-------------------------------------------------------|
| wildtype | GAAACAGUUAGACACUCCCCUAUCAAUUCAUGGCUGGGAAACAUCAUCCAG   |
| mutant   | GAGACCGUGCGGCAUAGCCCCAUA AACAGCUGGUUGGGCAAUAUAUACAA   |
|          | ** ** * * * * * * * * * * * * * * * * * * * * * * * * |

23. Sub-segment 8909-8959(total substitutions = 17)

|          |                                                      |
|----------|------------------------------------------------------|
| wildtype | UAUGCUGCAACCAUAUGGGUUCGCAUGGUCCUAAUGACACACUUCUUCUCC  |
| mutant   | UACGCCCCCACGAUCUGGGUGAGGAUGGUGUUGAUGACCCAUUUUUUUAGC  |
|          | ** * * * * * * * * * * * * * * * * * * * * * * * * * |

24. Sub-segment 8960-9010(total substitutions = 17)

|          |                                                      |
|----------|------------------------------------------------------|
| wildtype | AUUCUCAUGGUCCAAGACACCCUGGACCAGAACCUCAACUUUGAGAUGUAU  |
| mutant   | AUCUUGAUGGUGCAGGAUACGUUGGAUCAAAAUUUGAAUUUCGAAAUGUAC  |
|          | ** * * * * * * * * * * * * * * * * * * * * * * * * * |

25. Sub-segment 9011-9061(total substitutions = 22)

|          |                                                      |
|----------|------------------------------------------------------|
| wildtype | GGAUCAGUAUACUCCGUGAAUCCUUUGGACCUCCAGCCAUAUUUGAGAGG   |
| mutant   | GGCAGCGUGUAUAGCGUCAACCCCCUCGAUUUGCCCGCUAUCGAACGG     |
|          | ** * * * * * * * * * * * * * * * * * * * * * * * * * |

26. Sub-segment 9062-9097(total substitutions = 14)

|          |                                                     |
|----------|-----------------------------------------------------|
| wildtype | UUACACGGGCUUGACGCCUUUUCUAUGCACACAUAC                |
| mutant   | CUCCAUGGCUUGGAUGCGUUCAGCAUGCACACCUAU                |
|          | * * * * * * * * * * * * * * * * * * * * * * * * * * |

27. Sub-segment 9170-9226(total substitutions = 26)

|          |                                                           |
|----------|-----------------------------------------------------------|
| wildtype | AGUCGGGCUCGCGCAGUCAGGGCGUCCUCAUCUCCCGUGGAGGGAAAGCGCCGUU   |
| mutant   | UCCAGGGCCAGGGCCGUGCGGGCCAGCUUGAUAAGCAGGGGCGGCAAGGCCGCGGUG |
|          | **** * * * * * * * * * * * * * * * * * * * * * * * *      |

28. Sub-segment 9227-9289(total substitutions = 25)

|           |                                                                 |
|-----------|-----------------------------------------------------------------|
| wildtype: | UGC GCC GAUAUCUCUCAAUUGGGCGGUGAAGACCAAGCUCAAACUCACUCCAUUGCCGGAG |
| mutant:   | UGUGGGAGGUACUUGUUUAACUGGGCCGUCAAAACGAAAUUGAAGUUGACCCCCUCCCCGAG  |
|           | ** ** * * * * * * * * * * * * * * * * * * * * * * * *           |
